# Supplementary material for: Changes in the rest-activity rhythm in migraine patients are associated with anxiety symptoms
Source: PubMed Central journal article supplement — Braz J Psychiatry. 2022 Oct 24;44(6):611–20. doi: 10.47626/1516-4446-2021-2367 (PMC9851770; doi:10.47626/1516-4446-2021-2367), 2022-10-24
Supplement: bjp-44-06-611-suppl1.pdf [file bjp-44-06-611-suppl1.pdf]

**Table S1** Sociodemographic and lifestyle characteristics

| <b>Qualitative variables</b> | <b>NH group (n=23)</b> | <b>CM group (n=23)</b> |
|------------------------------|------------------------|------------------------|
| Gender                       |                        |                        |
| Female                       | 96.0 (22)              | 96.0 (22)              |
| Male                         | 4.0 (1)                | 4.0 (1)                |
| Skin color                   |                        |                        |
| White                        | 61.0 (14)              | 26.0 (6)               |
| Brown                        | 39.0 (9)               | 70.0 (16)              |
| Black                        | 0.0 (0)                | 4.0 (1)                |
| Marital status               |                        |                        |
| Married                      | 35.0 (8)               | 26.0 (6)               |
| Divorced                     | 0.0 (0)                | 4.0 (0)                |
| Single                       | 65.0 (15)              | 70.0 (16)              |
| Education                    |                        |                        |
| Some primary                 | 0.0 (0)                | 4.0 (1)                |
| Secondary                    | 4.0 (1)                | 22.0 (5)               |
| Higher                       | 57.0 (13)              | 30.0 (7)               |
| Some higher                  | 39.0 (9)               | 43.0 (10)              |
| Body mass index              |                        |                        |
| Underweight                  | 17.0 (4)               | 4.0 (1)                |
| Normal                       | 39.0 (9)               | 65.0 (15)              |
| Overweight                   | 26.0 (6)               | 17.0 (4)               |
| Obese                        | 17.0 (4)               | 13.0 (3)               |
| Employment situation         |                        |                        |
| Student                      | 26.0 (6)               | 35.0 (8)               |
| Self-employed                | 48.0 (11)              | 17.0 (4)               |
| Salaried                     | 22.0 (5)               | 30.0 (7)               |
| Unemployed                   | 4.0 (1)                | 17.0 (4)               |
| Other chronic diseases       | 17.0 (4)               | 9.0 (2)                |
| Respiratory changes          | 35.0 (8)               | 4.0 (1)                |
| Physical activity level      |                        |                        |
| Low                          | 52.2 (12)              | 78.3 (18)              |
| Moderate                     | 30.4 (7)               | 17.4 (4)               |
| High                         | 17.4 (4)               | 4.3 (1)                |
| Smoking                      |                        |                        |
| Never smoked                 | 91.3 (21)              | 95.7 (22)              |
| Former smoker                | 8.7 (2)                | 0.0 (0)                |
| Current smoker               | 0.0 (0)                | 4.3 (1)                |
| Alcohol consumption          |                        |                        |
| Rarely                       | 38.7 (9)               | 51.6 (12)              |
| Once a month                 | 51.6 (12)              | 34.4 (8)               |
| 1-4 times a month            | 8.7 (2)                | 12.9 (3)               |

Data presented as n (%), unless otherwise specified.

Values expressed as absolute and relative frequencies.

CM = chronic migraine; NH = non-headache.

**Table S2** Qualitative clinical characteristics of migraine attacks among affected individuals

| Qualitative variables                   | CM group (n=23) |
|-----------------------------------------|-----------------|
| Migraine onset                          |                 |
| Between 1 and 3 years                   | 17.4 (4)        |
| Between 3 and 10 years                  | 17.4 (4)        |
| > 10 years                              | 65.2 (15)       |
| Pain characteristic <sup>†</sup>        |                 |
| Pulsating                               | 82.6 (20)       |
| Burning                                 | 13.0 (3)        |
| Pressure                                | 47.8 (11)       |
| Shock                                   | 4.3 (1)         |
| Stitch                                  | 34.8 (8)        |
| Pain intensity                          |                 |
| Severe                                  | 52.2 (12)       |
| Moderate                                | 47.8 (11)       |
| Mild                                    | 0.0 (0)         |
| Progression of pain intensity           |                 |
| Growing                                 | 82.6 (19)       |
| Constant                                | 17.4 (4)        |
| Associated symptoms <sup>†</sup>        |                 |
| Nausea                                  | 87.0 (20)       |
| Emesis                                  | 56.5 (13)       |
| Photophobia                             | 87.0 (20)       |
| Phonophobia                             | 100.0 (23)      |
| Osmophobia                              | 82.6 (19)       |
| Dizziness                               | 34.8 (8)        |
| Reaction to pain                        |                 |
| Prefers to be in a dark and quiet place | 82.6 (19)       |
| Prefers walking or exercising           | 13.0 (3)        |
| Has no preference                       | 4.3 (1)         |
| Crisis duration                         |                 |
| ≤ 4 hours                               | 17.4 (4)        |
| 4-6 hours                               | 8.7 (2)         |
| 6-10 hours                              | 4.3 (1)         |
| 10-12 hours                             | 4.3 (1)         |
| 12-24 hours                             | 26.1 (6)        |
| >24 hours                               | 39.1 (9)        |
| Triggering factors <sup>†</sup>         |                 |
| Foods                                   | 73.9 (17)       |
| Fasting                                 | 82.6 (19)       |
| Odors                                   | 87.0 (20)       |
| Alcoholic beverages                     | 52.2 (12)       |
| Stress or anxiety symptoms              | 87.0 (20)       |
| Not enough sleep                        | 82.6 (19)       |
| Too much sleep                          | 43.5 (10)       |
| Menstruation <sup>‡</sup>               | 90.9 (20)       |
| Too much sun                            | 73.9 (17)       |

Data presented as n (%), unless otherwise specified.

CM = chronic migraine.

<sup>†</sup> The sum of values exceeds 100% as there was more than one aspect per individual.<sup>‡</sup> Only women were considered.

**Figure S1** Chronotype assessment of individuals with and without chronic migraine

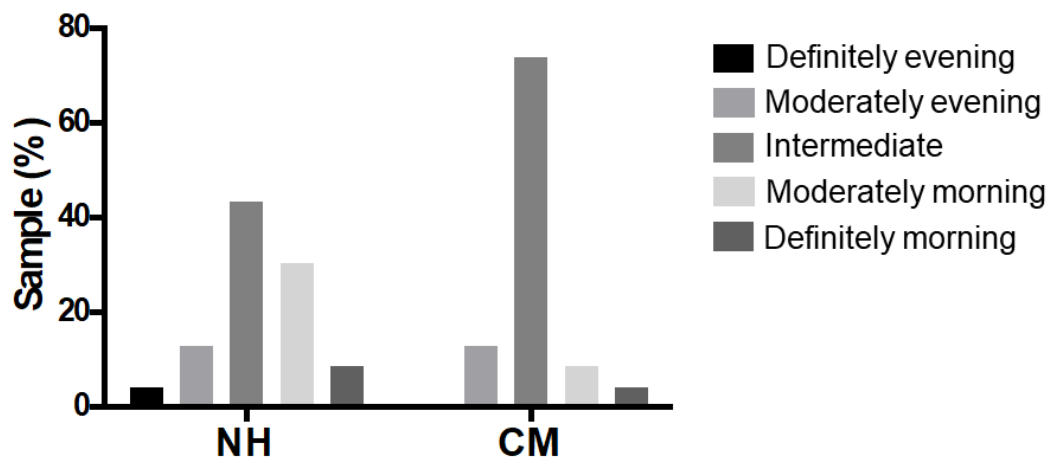

Results expressed as relative frequency, considering the NH (N = 23) and CM (N = 23) groups. CM = chronic migraine; NH = non-headache.

<http://doi.org/10.47626/1516-4446-2021-2367>

Changes in the rest-activity rhythm in migraine patients are associated with anxiety symptoms – David MCMM et al.

**Table S3** Components of the Pittsburgh Sleep Quality Index (PSQI)

|                                         | NH (n=23)<br>(mean ± SD) | CM (n=23)<br>(mean ± SD) | p-value    |
|-----------------------------------------|--------------------------|--------------------------|------------|
| Component 1: Sleep quality              | 1.04±0.56                | 1.96±0.98                | < 0.001*** |
| Component 2: Sleep latency              | 0.83±0.78                | 1.65±0.98                | < 0.01**   |
| Component 3: Sleep duration             | 0.26±0.54                | 0.74±0.75                | 0.02*      |
| Component 4: Habitual sleep efficiency  | 0.13±0.34                | 0.52±0.95                | 0.07       |
| Component 5: Sleep disorders            | 1.39±0.50                | 1.78±0.60                | 0.31       |
| Component 6: Use of sleeping medication | 0.35±1.47                | 0.26±0.62                | 0.47       |
| Component 7: Daytime dysfunction        | 1.17±0.65                | 1.83±0.78                | 0.05       |
| Total PSQI                              | 5.17±2.31                | 8.74±2.60                | < 0.001*** |

CM = chronic migraine; NH = non-headache.

Mann-Whitney *U* test; \*  $p < 0.05$ ; \*\*  $p < 0.01$ ; \*\*\*  $p < 0.001$ .

**Table S4** Linear regression analysis between actimetric variables and symptoms of state anxiety in individuals with and without chronic migraine

| Activity/rest rhythm          | STAI-S (+) |        |                |      | STAI-S (-) |        |                |      | STAI-S (total) |        |                |      |
|-------------------------------|------------|--------|----------------|------|------------|--------|----------------|------|----------------|--------|----------------|------|
|                               | EST        | SE     | R <sup>2</sup> | p    | EST        | SE     | R <sup>2</sup> | p    | EST            | SE     | R <sup>2</sup> | p    |
| Interaction between variables |            |        |                |      |            |        |                |      |                |        |                |      |
| MESOR <sup>†</sup>            | -0.22      | 0.15   | 0.11           | 0.14 | 0.09       | 0.14   | 0.07           | 0.52 | -0.13          | 0.21   | 0.08           | 0.52 |
| Amplitude <sup>†</sup>        | -0.13      | 0.15   | 0.06           | 0.37 | 0.05       | 0.14   | 0.04           | 0.70 | -0.08          | 0.21   | 0.07           | 0.69 |
| Acrophase                     | -0.00      | 0.02   | 0.06           | 0.81 | 0.01       | 0.01   | 0.08           | 0.43 | 0.01           | 0.02   | 0.08           | 0.62 |
| %V                            | -0.14      | 0.16   | 0.08           | 0.39 | 0.02       | 0.14   | 0.07           | 0.90 | -0.11          | 0.23   | 0.07           | 0.63 |
| L5 <sup>†</sup>               | -0.17      | 0.27   | 0.05           | 0.53 | 0.03       | 0.25   | 0.03           | 0.90 | -0.14          | 0.37   | 0.07           | 0.71 |
| M10 <sup>†</sup>              | -0.14      | 0.10   | 0.13           | 0.16 | 0.08       | 0.10   | 0.10           | 0.42 | -0.07          | 0.15   | 0.07           | 0.65 |
| IS                            | 0.34       | 10.78  | 0.05           | 0.97 | -1.44      | 9.13   | 0.10           | 0.87 | -0.41          | 15.01  | 0.09           | 0.97 |
| IV                            | 14.52      | 12.47  | 0.13           | 0.25 | -1.86      | 11.02  | 0.09           | 0.86 | 8.28           | 18.35  | 0.07           | 0.65 |
| AR                            | 9.22       | 11.19  | 0.08           | 0.41 | 4.60       | 10.00  | 0.02           | 0.64 | 8.29           | 16.02  | 0.07           | 0.60 |
| AUC <sub>Activity</sub>       | 000.0      | 0.000  | 0.06           | 0.61 | 0.000      | 0.000  | 0.01           | 0.70 | 0.000          | 0.000  | 0.07           | 0.47 |
| %AUC <sub>4h</sub>            | 0.123      | 0.478  | 0.06           | 0.80 | -0.377     | 0.421  | 0.03           | 0.38 | -0.205         | 0.678  | 0.06           | 0.76 |
| %AUC <sub>Sleep</sub>         | -0.171     | 0.504  | 0.06           | 0.74 | -0.239     | 0.447  | 0.01           | 0.59 | -0.070         | 0.715  | 0.06           | 0.92 |
| CVAON                         | 1.710      | 16.751 | 0.07           | 0.92 | -4.994     | 14.637 | 0.06           | 0.73 | -1.477         | 23.327 | 0.11           | 0.95 |
| CVAOF                         | 44.544     | 45.546 | 0.08           | 0.33 | 16.577     | 40.680 | 0.02           | 0.69 | 68.575         | 64.366 | 0.09           | 0.29 |
| CFI                           | -0.120     | 25.207 | 0.09           | 1.00 | -22.67     | 22.435 | 0.03           | 0.32 | -33.752        | 35.434 | 0.11           | 0.35 |
| SRI                           | -0.139     | 0.119  | 0.09           | 0.25 | -0.035     | 0.108  | 0.01           | 0.74 | -0.222         | 0.168  | 0.10           | 0.19 |
| fSoD                          | -6.236     | 14.330 | 0.06           | 0.67 | -1.056     | 12.694 | 0.02           | 0.93 | -5.002         | 20.292 | 0.07           | 0.81 |
| k <sub>RA</sub>               | -20.411    | 46.434 | 0.07           | 0.66 | -15.33     | 41.398 | 0.01           | 0.71 | -7.872         | 66.308 | 0.06           | 0.91 |
| CM interference <sup>‡</sup>  |            |        |                |      |            |        |                |      |                |        |                |      |
| MESOR <sup>†</sup>            | 0.18       | 0.16   | 0.11           | 0.27 | -0.02      | 0.16   | 0.07           | 0.90 | 0.16           | 0.23   | 0.08           | 0.48 |
| Amplitude <sup>†</sup>        | 0.13       | 0.17   | 0.06           | 0.45 | -0.02      | 0.16   | 0.04           | 0.89 | 0.11           | 0.24   | 0.07           | 0.64 |
| Acrophase                     | 0.01       | 0.02   | 0.06           | 0.76 | -0.02      | 0.02   | 0.08           | 0.18 | -0.02          | 0.03   | 0.08           | 0.43 |
| %V                            | 0.08       | 0.20   | 0.08           | 0.66 | 0.14       | 0.17   | 0.07           | 0.42 | 0.21           | 0.28   | 0.07           | 0.45 |
| L5 <sup>†</sup>               | 0.12       | 0.37   | 0.05           | 0.74 | 0.05       | 0.35   | 0.03           | 0.89 | 0.17           | 0.51   | 0.07           | 0.74 |
| M10 <sup>†</sup>              | 0.06       | 0.13   | 0.13           | 0.63 | 0.03       | 0.12   | 0.10           | 0.81 | 0.09           | 0.19   | 0.07           | 0.63 |
| IS                            | -0.24      | 14.02  | 0.05           | 0.98 | 16.90      | 11.87  | 0.10           | 0.16 | 15.97          | 19.52  | 0.09           | 0.41 |
| IV                            | 1.36       | 16.49  | 0.13           | 0.93 | -17.07     | 14.57  | 0.09           | 0.24 | -11.32         | 24.27  | 0.07           | 0.64 |
| AR                            | -0.98      | 16.50  | 0.08           | 0.95 | -10.83     | 14.75  | 0.02           | 0.46 | -6.29          | 23.63  | 0.07           | 0.79 |
| AUC <sub>Activity</sub>       | 0.00       | 0.00   | 0.06           | 0.70 | 0.00       | 0.000  | 0.01           | 0.77 | 0.00           | 0.000  | 0.07           | 0.57 |

Changes in the rest-activity rhythm in migraine patients are associated with anxiety symptoms – David MCMM et al.

|                       |        |        |      |      |        |        |      |      |        |        |      |      |
|-----------------------|--------|--------|------|------|--------|--------|------|------|--------|--------|------|------|
| %AUC <sub>4h</sub>    | -0.11  | 0.62   | 0.06 | 0.86 | 0.45   | 0.544  | 0.03 | 0.41 | -0.29  | 0.876  | 0.06 | 0.74 |
| %AUC <sub>Sleep</sub> | 0.29   | 0.58   | 0.06 | 0.61 | 0.28   | 0.513  | 0.01 | 0.58 | 0.24   | 0.820  | 0.06 | 0.77 |
| CVAON                 | -9.88  | 19.21  | 0.07 | 0.61 | -6.71  | 16.782 | 0.06 | 0.69 | -18.40 | 26.746 | 0.11 | 0.49 |
| CVAOF                 | -43.84 | 47.51  | 0.08 | 0.36 | -22.94 | 42.439 | 0.02 | 0.59 | -77.23 | 67.148 | 0.09 | 0.27 |
| CFI                   | 18.37  | 29.50  | 0.09 | 0.54 | 28.43  | 26.256 | 0.03 | 0.28 | 57.78  | 41.468 | 0.11 | 0.17 |
| SRI                   | 0.17   | 0.13   | 0.09 | 0.20 | 0.04   | 0.119  | 0.01 | 0.75 | 0.25   | 0.186  | 0.10 | 0.18 |
| fSoD                  | 7.81   | 18.29  | 0.06 | 0.67 | 7.35   | 16.203 | 0.02 | 0.65 | 12.87  | 25.901 | 0.07 | 0.62 |
| k <sub>RA</sub>       | -62.03 | 126.10 | 0.07 | 0.62 | 60.93  | 112.43 | 0.01 | 0.59 | -28.98 | 180.08 | 0.06 | 0.87 |

Results considering the NH (n=23) and CM (n=23) groups.

NH = non-headache; CM = chronic migraine; EST = estimate; SE = standard error; STAI = State-Trait Anxiety Inventory; E = state; (+) = positive statements; (-) = negative statements; MESOR = mean estimated statistic over rhythm; Amplitude = difference between the highest value and the MESOR; Acrophase = highest phase point; % V = rhythmic percentage (refers to the degree of fit of the rest-activity rhythm to the cosine curve); L5 = average activity of the 5 continuous least active hours; M10 = average activity of the 10 continuous most active hours; IS = interdaily stability (stability of the rhythm over days); IV = Intradaily variability (a proxy of rhythm fragmentation); RA = Relative amplitude (the difference between M10 and L5 divided by the sum of M10 and L5); AUC<sub>Activity</sub> = area under the curve of the amount of activity over 24 hours; %AUC<sub>4h</sub> = amount of activity 4 hours before sleep starts; %AUC<sub>Sleep</sub> = amount of activity during sleep; CVAON = coefficient of variation of activity onset (variation of wake-up time); CVAOF = coefficient of variation of activity offset (variation of sleep onset time); CFI = Circadian Function Index (a global measure to assess the robustness of the rest-activity rhythm); SRI = Sleep Regularity Index (regularity of sleeping and waking times over days); fSoD = fraction of sleep over daytime; k<sub>RA</sub> = transition probability to awake once in sustained sleep = the higher the value, the greater the possibility of waking up from sleep.

† The variables represent the values of 34 individuals (NH group = 17; CM group = 17). Multiple linear regression test.

‡ In this analysis, we investigated the interference of the group of individuals with chronic migraine on the interaction between the variables.

**Table S5** Linear regression analysis between actimetric variables and trait anxiety symptoms in individuals with and without chronic migraine

| Activity/rest rhythm          | STAI-T (+) |       |                |              | STAI-T (-) |       |                |      | STAI-T (Total) |        |                |      |
|-------------------------------|------------|-------|----------------|--------------|------------|-------|----------------|------|----------------|--------|----------------|------|
|                               | EST        | SE    | R <sup>2</sup> | p            | EST        | SE    | R <sup>2</sup> | p    | EST            | SE     | R <sup>2</sup> | p    |
| Interaction between variables |            |       |                |              |            |       |                |      |                |        |                |      |
| MESOR <sup>†</sup>            | 0.08       | 0.11  | 0.13           | 0.51         | 0.07       | 0.23  | 0.03           | 0.74 | 0.15           | 0.31   | 0.06           | 0.62 |
| Amplitude <sup>†</sup>        | 0.07       | 0.11  | 0.14           | 0.55         | 0.19       | 0.22  | 0.06           | 0.40 | 0.25           | 0.30   | 0.09           | 0.40 |
| Acrophase                     | -0.02      | 0.01  | 0.13           | 0.15         | -0.02      | 0.02  | 0.20           | 0.31 | -0.04          | 0.03   | 0.20           | 0.18 |
| %V                            | -0.03      | 0.12  | 0.04           | 0.80         | 0.07       | 0.23  | 0.01           | 0.77 | 0.04           | 0.32   | 0.02           | 0.91 |
| L5 <sup>†</sup>               | 0.13       | 0.21  | 0.13           | 0.52         | -0.06      | 0.49  | 0.01           | 0.88 | 0.07           | 0.55   | 0.04           | 0.89 |
| M10 <sup>†</sup>              | 0.05       | 0.08  | 0.18           | 0.49         | 0.12       | 0.16  | 0.03           | 0.46 | 0.17           | 0.21   | 0.07           | 0.43 |
| IS                            | 4.78       | 7.88  | 0.06           | 0.54         | 13.22      | 14.95 | 0.02           | 0.38 | 18.01          | 20.42  | 0.04           | 0.38 |
| IV                            | 3.27       | 9.28  | 0.10           | 0.72         | -11.95     | 18.09 | 0.02           | 0.51 | -8.67          | 24.66  | 0.03           | 0.72 |
| AR                            | 8.40       | 7.87  | 0.15           | 0.29         | -0.02      | 15.67 | 0.03           | 0.99 | 8.39           | 21.07  | 0.07           | 0.69 |
| AUC <sub>Activity</sub>       | 0.00       | 0.00  | 0.18           | 0.26         | 0.00       | 0.00  | 0.04           | 0.67 | 0.000          | 0.000  | 0.08           | 0.91 |
| %AUC <sub>4h</sub>            | -0.16      | 0.33  | 0.15           | 0.64         | -0.39      | 0.65  | 0.06           | 0.55 | -0.547         | 0.875  | 0.10           | 0.53 |
| %AUC <sub>Sleep</sub>         | -0.56      | 0.31  | 0.35           | 0.07         | -0.54      | 0.65  | 0.15           | 0.41 | -1.103         | 0.840  | 0.26           | 0.20 |
| CVAON                         | -1.19      | 12.30 | 0.07           | 0.92         | -3.81      | 23.65 | 0.01           | 0.87 | -5.002         | 32.225 | 0.02           | 0.88 |
| CVAOF                         | 9.48       | 33.41 | 0.07           | 0.78         | 27.10      | 64.22 | 0.01           | 0.67 | 36.583         | 87.391 | 0.03           | 0.68 |
| CFI                           | 23.15      | 18.06 | 0.13           | 0.21         | 4.26       | 35.46 | 0.03           | 0.90 | 27.412         | 47.888 | 0.06           | 0.57 |
| SRI                           | -0.01      | 0.09  | 0.07           | 0.93         | -0.02      | 0.17  | 0.05           | 0.91 | -0.028         | 0.227  | 0.07           | 0.90 |
| fSoD                          | -5.66      | 10.51 | 0.06           | 0.59         | -2.49      | 19.93 | 0.02           | 0.90 | -8.150         | 27.216 | 0.04           | 0.77 |
| k <sub>RA</sub>               | -28.54     | 33.80 | 0.08           | 0.40         | 44.49      | 62.78 | 0.09           | 0.48 | 15.946         | 86.494 | 0.08           | 0.85 |
| CM interference <sup>‡</sup>  |            |       |                |              |            |       |                |      |                |        |                |      |
| MESOR <sup>†</sup>            | -0.08      | 0.13  | 0.13           | 0.55         | -0.00      | 0.25  | 0.03           | 0.99 | -0.08          | 0.34   | 0.06           | 0.81 |
| Amplitude <sup>†</sup>        | -0.11      | 0.13  | 0.14           | 0.39         | -0.30      | 0.25  | 0.06           | 0.24 | -0.41          | 0.34   | 0.09           | 0.23 |
| Acrophase                     | 0.01       | 0.01  | 0.13           | 0.47         | -0.01      | 0.02  | 0.20           | 0.77 | 0.00           | 0.03   | 0.20           | 0.93 |
| %V                            | 0.04       | 0.15  | 0.04           | 0.77         | -0.01      | 0.28  | 0.01           | 0.96 | 0.03           | 0.38   | 0.02           | 0.94 |
| L5 <sup>†</sup>               | -0.19      | 0.28  | 0.13           | 0.51         | 0.10       | 0.56  | 0.01           | 0.85 | -0.09          | 0.75   | 0.04           | 0.91 |
| M10 <sup>†</sup>              | -0.13      | 0.10  | 0.18           | 0.19         | -0.11      | 0.20  | 0.03           | 0.60 | -0.24          | 0.27   | 0.07           | 0.38 |
| IS                            | -10.18     | 10.25 | 0.06           | 0.32         | -17.04     | 19.44 | 0.02           | 0.38 | -27.22         | 26.55  | 0.04           | 0.31 |
| IV                            | 10.28      | 12.27 | 0.10           | 0.40         | 16.30      | 23.91 | 0.02           | 0.49 | 26.58          | 32.60  | 0.03           | 0.41 |
| RA                            | -26.57     | 11.61 | 0.15           | <b>0.02*</b> | -18.50     | 23.11 | 0.03           | 0.42 | -45.07         | 31.07  | 0.07           | 0.15 |
| AUC <sub>Activity</sub>       | -0.47      | 0.43  | 0.18           | <b>0.02*</b> | 0.000      | 0.000 | 0.04           | 0.74 | 0.000          | 0.000  | 0.08           | 0.27 |
| %AUC <sub>4h</sub>            | -0.47      | 0.43  | 0.15           | 0.28         | -3.39      | 0.84  | 0.06           | 0.65 | -0.856         | 1.130  | 0.10           | 0.45 |

|                       |        |       |      |               |        |        |      |      |        |        |      |              |
|-----------------------|--------|-------|------|---------------|--------|--------|------|------|--------|--------|------|--------------|
| %AUC <sub>Sleep</sub> | 1.27   | 0.43  | 0.35 | <b>0.001*</b> | 1.48   | 0.75   | 0.15 | 0.15 | 2.751  | 0.963  | 0.26 | <b>0.007</b> |
| CVAON                 | -6.90  | 14.11 | 0.07 | 0.63          | -0.36  | 27.12  | 0.01 | 0.99 | -7.260 | 36.947 | 0.02 | 0.84         |
| CVAOF                 | 3.17   | 34.85 | 0.07 | 0.93          | -17.64 | 66.10  | 0.01 | 0.79 | -14.47 | 91.168 | 0.03 | 0.87         |
| CFI                   | -41.09 | 21.13 | 0.13 | <b>0.059*</b> | -26.47 | 41.50  | 0.03 | 0.53 | -67.55 | 56.043 | 0.06 | 0.23         |
| SRI                   | -0.05  | 0.10  | 0.07 | 0.64          | -0.09  | 0.18   | 0.05 | 0.63 | -0.134 | 0.251  | 0.07 | 0.60         |
| fSoD                  | 12.26  | 13.42 | 0.06 | 0.37          | 16.73  | 25.45  | 0.02 | 0.51 | 28.990 | 34.740 | 0.04 | 0.41         |
| k <sub>RA</sub>       | 128.95 | 91.79 | 0.08 | 0.17          | 245.49 | 170.50 | 0.09 | 0.16 | 374.44 | 234.90 | 0.08 | 0.12         |

Bold type denotes statistical significance.

Results considering the NH (n=23) and CM (n=23) groups.

NH = non-headache; CM = chronic migraine; EST = estimate; SE = standard error; STAI = State-Trait Anxiety Inventory; T = dash; (+) = positive statements; (-) = negative statements; MESOR = mean estimated statistic over rhythm; Amplitude = difference between the highest value and the MESOR; Acrophase = highest phase point; % V = rhythmic percentage (refers to the degree of fit of the rest-activity rhythm to the cosine curve); L5 = average activity of the 5 continuous least active hours; M10 = average activity of the 10 continuous most active hours; IS = interdaily stability (stability of the rhythm over days); IV = intradaily variability (a proxy of rhythm fragmentation); RA = relative amplitude (the difference between M10 and L5 divided by the sum of M10 and L5); AUC<sub>Activity</sub> = area under the curve of the amount of activity over 24 hours; %AUC<sub>4h</sub> = amount of activity 4 hours before sleep starts; %AUC<sub>Sleep</sub> = amount of activity during sleep; CVAON = coefficient of variation of activity onset (variation of wake-up time); CVAOF = coefficient of variation of activity offset (variation of sleep onset time); CFI = Circadian Function Index (a global measure to assess the robustness of the rest-activity rhythm); SRI = Sleep Regularity Index (regularity of sleeping and waking times over days); fSoD = fraction of sleep over daytime; k<sub>RA</sub> = transition probability to awake once in sustained sleep = the higher the value, the greater the possibility of waking up from sleep.

† The variables represent the values of 34 individuals (NH group = 17; CM group = 17).

‡ In this analysis, we investigated the interference of the group of individuals with chronic migraine on the interaction between the variables.

Multiple linear regression test, \* p < 0.05.



**Table S6** Linear regression analysis between actimetric variables and depressive symptoms in individuals with and without chronic migraine

|                               | Estimate | Standard error | R <sup>2</sup> | p    |
|-------------------------------|----------|----------------|----------------|------|
| Interaction between variables |          |                |                |      |
| MESOR <sup>†</sup>            | -0.02    | 0.16           | 0.23           | 0.87 |
| Amplitude <sup>†</sup>        | -0.10    | 0.15           | 0.27           | 0.51 |
| Acrophase                     | 0.02     | 0.02           | 0.29           | 0.25 |
| %V                            | 0.01     | 0.18           | 0.22           | 0.93 |
| L5 <sup>†</sup>               | 0.29     | 0.28           | 0.24           | 0.31 |
| M10 <sup>†</sup>              | -0.04    | 0.11           | 0.27           | 0.71 |
| IS                            | 5.13     | 11.86          | 0.22           | 0.66 |
| IV                            | 6.59     | 13.05          | 0.35           | 0.61 |
| AR                            | -12.57   | 12.24          | 0.25           | 0.31 |
| AUC <sub>Activity</sub>       | 0.000    | 0.000          | 0.24           | 0.37 |
| %AUC <sub>4h</sub>            | 0.568    | 0.519          | 0.24           | 0.28 |
| %AUC <sub>Sleep</sub>         | -0.036   | 0.501          | 0.37           | 0.94 |
| CVAON                         | -18.661  | 17.729         | 0.29           | 0.30 |
| CVAOF                         | -45.826  | 52.603         | 0.23           | 0.37 |
| CFI                           | -20.625  | 28.119         | 0.22           | 0.47 |
| SRI                           | -0.023   | 0.132          | 0.24           | 0.86 |
| fSoD                          | 1.305    | 15.764         | 0.22           | 0.93 |
| k <sub>RA</sub>               | -1.350   | 51.158         | 0.23           | 0.98 |
| CM interference <sup>‡</sup>  |          |                |                |      |
| MESOR <sup>†</sup>            | -0.04    | 0.18           | 0.23           | 0.81 |
| Amplitude <sup>†</sup>        | -0.01    | 0.17           | 0.27           | 0.93 |
| Acrophase                     | -0.03    | 0.02           | 0.29           | 0.08 |
| %V                            | -0.07    | 0.22           | 0.22           | 0.73 |
| L5 <sup>†</sup>               | -0.36    | 0.38           | 0.24           | 0.35 |
| M10 <sup>†</sup>              | -0.09    | 0.14           | 0.27           | 0.52 |
| IS                            | -9.55    | 15.43          | 0.22           | 0.53 |
| IV                            | 26.42    | 17.25          | 0.35           | 0.13 |
| AR                            | -0.63    | 18.05          | 0.25           | 0.97 |
| AUC <sub>Activity</sub>       | 0.000    | 0.000          | 0.24           | 0.81 |
| %AUC <sub>4h</sub>            | -0.852   | 0.671          | 0.24           | 0.21 |
| %AUC <sub>Sleep</sub>         | 0.935    | 0.574          | 0.37           | 0.11 |
| CVAON                         | -0.045   | 20.327         | 0.29           | 1.00 |
| CVAOF                         | 45.644   | 52.603         | 0.23           | 0.39 |
| CFI                           | 15.405   | 32.908         | 0.22           | 0.64 |
| SRI                           | -0.051   | 0.146          | 0.24           | 0.73 |
| fSoD                          | 8.469    | 20.122         | 0.22           | 0.68 |
| k <sub>RA</sub>               | 128.455  | 138.932        | 0.23           | 0.36 |

Results considering the NH (n=23) and CM (n=23) groups.

IDB = Beck's Depression Inventory; MESOR = mean estimated statistic over rhythm; Amplitude = difference between the highest value and the MESOR; Acrophase = highest phase point; % V = rhythmic percentage (refers to the degree of fit of the rest-activity rhythm to the cosine curve); L5 = average activity of the 5 continuous least active hours; M10 = average activity of the 10 continuous most active hours; IS = interdaily stability (stability of the rhythm over days); IV = intradaily variability (a proxy of rhythm fragmentation); RA = relative amplitude (the difference between M10 and L5 divided by the sum of M10 and L5); AUC<sub>Activity</sub> = area under the curve of the amount of activity over 24 hours; %AUC<sub>4h</sub> = amount of activity 4 hours before sleep starts; %AUC<sub>Sleep</sub> = amount of activity during sleep; CVAON = coefficient of variation of activity onset (variation of wake-up time); CVAOF = coefficient of variation of activity offset (variation of sleep onset time); CFI = Circadian Function Index (a global measure to assess the robustness of the rest-activity rhythm); SRI = Sleep Regularity Index (regularity of sleeping and waking times over days); fSoD = fraction of sleep over daytime; k<sub>RA</sub> = transition probability to awake once in sustained sleep = the higher the value, the greater the possibility of waking up from sleep.

<sup>†</sup> The variables represent the values of 34 individuals (NH group = 17; CM group = 17). Multiple linear regression test.

<sup>‡</sup> In this analysis, we investigated the interference of the group of individuals with CM on the interaction between variables.
